# Supplementary material for: MiR-320a inhibits gastric carcinoma by targeting activity in the FoxM1-P27KIP1 axis
Source: PubMed Central journal article supplement (PMC5045395; doi:10.18632/oncotarget.8676), 2016-04-11
Supplement: oncotarget-07-29275-s001.pdf [file oncotarget-07-29275-s001.pdf]

## SUPPLEMENTARY TABLE

Supplementary Table S1: Association of miR-320a and FoxM1 expression in human gastric cancer tissues.

| Category        | No. of patients | miR-320a |     |          | FoxM1 |     |          |
|-----------------|-----------------|----------|-----|----------|-------|-----|----------|
|                 |                 | high     | low | <i>P</i> | high  | low | <i>P</i> |
| Age             |                 |          |     | >0.05    |       |     | >0.05    |
| < 60 years      | 9               | 3        | 6   |          | 8     | 1   |          |
| ≥60 years       | 13              | 5        | 8   |          | 10    | 3   |          |
| Sex             |                 |          |     | >0.05    |       |     | >0.05    |
| Male            | 14              | 5        | 9   |          | 8     | 6   |          |
| Female          | 8               | 3        | 5   |          | 6     | 2   |          |
| Differentiation |                 |          |     | >0.05    |       |     | >0.05    |
| Well            | 10              | 4        | 6   |          | 7     | 3   |          |
| Poor            | 12              | 4        | 8   |          | 8     | 4   |          |
| Tumor size      |                 |          |     | <0.05    |       |     | <0.05    |
| ≤5cm            | 10              | 8        | 2   |          | 3     | 7   |          |
| >5cm            | 12              | 3        | 9   |          | 10    | 2   |          |
